# Supplementary material for: Cloning and Functional Analysis of CsROP5 and CsROP10 Genes Involved in Cucumber Resistance to Corynespora cassiicola
Source: MDPI journal article supplement (doi:10.3390/biology13050308), 2024-04-28
Supplement: s1 [file s1]

**Table S1** The primers of RT-qPCR used in this study

| Analysis                               |     | Primer name         | Sequence(5'-3')         | Tm/<br>°C | Amplicon<br>size/bp |
|----------------------------------------|-----|---------------------|-------------------------|-----------|---------------------|
| <i>CsPR2</i>                           | for | <i>CsPR2</i> -F     | AAGACAACATCCTCAACTTTGC  | 58        | 192                 |
| qRT-RCR                                | in  | <i>CsPR2</i> -R     | CTGCTGAAAGAATTCCAGTGTG  | 58        |                     |
| transgenic<br>cucumber                 |     |                     |                         |           |                     |
| <i>CsPR3</i>                           | for | <i>CsPR3</i> -F     | CATTCTCTCATCCTTTGGCAG   | 60        | 287                 |
| qRT-RCR                                | in  | <i>CsPR3</i> -R     | GATATCGAAATCAACGCCATCC  | 60        |                     |
| transgenic<br>cucumber                 |     |                     |                         |           |                     |
| <i>CsPYL2</i>                          | for | <i>CsPYL2</i> -F    | CAGAAATCATTGATGGACGACC  | 60        | 143                 |
| qRT-RCR                                | in  | <i>CsPYL2</i> -R    | TGAAACATCAGCAAGTGAAGTTG | 60        |                     |
| transgenic<br>cucumber                 |     |                     |                         |           |                     |
| <i>CsPP2C2</i>                         | for | <i>CsPP2C2</i> -F   | TATTCCTGATCCAGAAGTCATG  | 60        | 227                 |
| qRT-RCR                                | in  | <i>CsPP2C2</i> -R   | CAAGCATTGAGAGGTAATCTGC  | 60        |                     |
| transgenic<br>cucumber                 |     |                     |                         |           |                     |
| <i>CsSnRK2.2</i>                       | for | <i>CsSnRK2.2</i> -F | GCAGATCCAGAGACGAGAATAA  | 58        | 140                 |
| qRT-RCR                                | in  | <i>CsSnRK2.2</i> -R | TCAATACTCTGTGTTGCCTCAT  | 58        |                     |
| transgenic<br>cucumber                 |     |                     |                         |           |                     |
| <i>CsABI5</i>                          | for | <i>CsABI5</i> -F    | GAATCGCCATTACAGTCTGAAC  | 58        | 95                  |
| qRT-RCR                                | in  | <i>CsABI5</i> -R    | AACTCATCCAATGTGAGTGAGT  | 58        |                     |
| transgenic<br>cucumber                 |     |                     |                         |           |                     |
| <i>CsRbohD</i>                         | for | <i>CsRbohD</i> -F   | GCGTAACATTACTGGTGATTCC  | 58        | 132                 |
| qRT-RCR                                | in  | <i>CsRbohD</i> -R   | ATTCTTCCATCAGCATCCGTAT  | 58        |                     |
| transgenic<br>cucumber                 |     |                     |                         |           |                     |
| <i>CsRbohF</i>                         | for | <i>CsRbohF</i> -F   | ATCGGACGATATTACACAGCTT  | 58        | 94                  |
| qRT-RCR                                | in  | <i>CsRbohF</i> -R   | TTGTACATCAAGCGTCACCT    | 58        |                     |
| transgenic<br>cucumber                 |     |                     |                         |           |                     |
| Cucumber                               |     | Actin-F             | TCGTGCTGGATTCTGGTG      | 60        | 161                 |
| <i>CsActin</i> gene for<br>and qRT-PCR |     | Actin-R             | GGCAGTGGTGGTGAACAT      | 60        |                     |

**Table S2** List of primers used in the study

| Analysis                                 | Primer name          | Sequence(5'-3')                    | Tm | Amplicon size |
|------------------------------------------|----------------------|------------------------------------|----|---------------|
| Sequencing of the cDNA of <i>CsROP5</i>  | <i>CsROP5</i> -F     | CATATGCCC <u>GTCGAC</u> ATGAGCGCTT | 60 | 591           |
|                                          | <i>CsROP5</i> -R     | CAAGGTTC                           |    |               |
|                                          |                      | GCTCACCAT <u>GGATCCT</u> AATATCGAG | 60 |               |
|                                          |                      | CATGCTTTC                          |    |               |
| Sequencing of the cDNA of <i>CsROP10</i> | <i>CsROP10</i> -F    | CATATGCCC <u>GTCGAC</u> ATGGCTTCCA | 60 | 630           |
|                                          | <i>CsROP10</i> -R    | GTGCTTCA                           |    |               |
|                                          |                      | GCTCACCAT <u>GGATCC</u> ACTTTGCCTC | 60 |               |
|                                          |                      | GTAAGGTTTC                         |    |               |
| RT-qPCR for <i>CsROP5</i>                | <i>CsROP5</i> -qF    | TGCTCCAGGAGTGCCTATTGTTC            | 60 | 125           |
|                                          | <i>CsROP5</i> -qR    | GCTTTCTAAGCTCCTCTCCCTGAG           | 60 |               |
| RT-qPCR for <i>CsROP10</i>               | <i>CsROP10</i> -qF   | CGTTAGTTAGCCGAGCGAGTTACG           | 60 | 61            |
|                                          | <i>CsROP10</i> -qR   | TGTTGAAGCTCCGGAATCCACTTC           | 60 |               |
| <i>CsROP5</i> -silencing vector          | <i>CsROP5</i> -TF    | GTGAGTAAGGTTACCGAATTCGCAG          | 60 | 214 bp        |
|                                          | <i>CsROP5</i> -TR    | TTCTTTATTGATC                      |    |               |
|                                          |                      | GGCCTCGAGACGCGT <u>GAGCTCT</u> AAT | 60 |               |
|                                          |                      | ATCGAGCATGCTTTC                    |    |               |
| <i>CsROP10</i> -silencing vector         | <i>CsROP10</i> -TF   | GTGAGTAAGGTTACCGAATTCGCAG          | 60 | 202           |
|                                          | <i>CsROP10</i> -TR   | GGTGAGGAACTC                       |    |               |
|                                          |                      | GGCCTCGAGACGCGT <u>GAGCTC</u> ACTT | 60 |               |
|                                          |                      | TGCCTCGTAAGGTTTC                   |    |               |
| <i>CsROP5</i> -overexpression vector     | <i>CsROP5</i> -GF    | CATATGCCC <u>GTCGAC</u> ATGAGCGCTT | 60 | 591           |
|                                          | <i>CsROP5</i> -GR    | CAAGGTTC                           |    |               |
|                                          |                      | GCTCACCAT <u>GGATCCT</u> AATATCGAG | 60 |               |
|                                          |                      | CATGCTTTC                          |    |               |
| <i>CsROP10</i> -overexpression vector    | <i>CsROP10</i> -GF   | CATATGCCC <u>GTCGAC</u> ATGGCTTCCA | 60 | 630           |
|                                          | <i>CsROP10</i> -GR   | GTGCTTCA                           |    |               |
|                                          |                      | GCTCACCAT <u>GGATCC</u> ACTTTGCCTC | 60 |               |
|                                          |                      | GTAAGGTTTC                         |    |               |
| Chimeric primer for <i>CsROP5</i> -nGFP  | <i>CsROP5</i> -nG-F  | GGGAGTTTTTGATGCAGCAATTAG           | 60 | 267           |
|                                          | <i>CsROP5</i> -nG-R  | GGCACGGGCAGCTTGCCGGTGGTG           | 60 |               |
| Chimeric primer for <i>CsROP10</i> -nGFP | <i>CsROP10</i> -nG-F | CCAGCAGAATGTGAAATCAG               | 58 | 315           |
|                                          | <i>CsROP10</i> -nG-R | GGCACGGGCAGCTTGCCGGT               | 58 |               |
