# Supplementary material for: Cloning and Functional Analysis of CsROP5 and CsROP10 Genes Involved in Cucumber Resistance to Corynespora cassiicola
Source: MDPI journal article supplement (doi:10.3390/biology13050308), 2024-04-28
Supplement: s1 [file s1]

|                  |                                                                                   |     |
|------------------|-----------------------------------------------------------------------------------|-----|
| Cucsa.322750.seq | .....ATGAGCGCTTCAAGGTTTCATCAAGTGCCTACCGTTGGAGATGGAGCTGTTGGCAAAAC                  | 59  |
| ROP5_Clone.seq   | TTGATACATATGCCCGTCGAGATGAGCGCTTCAAGGTTTCATCAAGTGCCTACCGTTGGAGATGGAGCTGTTGGCAAAAC  | 80  |
| Consensus        | atgagcgcttcaaggttcatcaagtgcgtaacggttggagatggagctgttggcaaaac                       |     |
| Cucsa.322750.seq | TTGTCTCCTTATCTCCTATACCAGCAACACCTTCCCCACTGATTATGTGCCTACGGTTTTTGATAATTCAGTGCAAAATG  | 139 |
| ROP5_Clone.seq   | TTGTCTCCTTATCTCCTATACCAGCAACACCTTCCCCACTGATTATGTGCCTACGGTTTTTGATAATTCAGTGCAAAATG  | 160 |
| Consensus        | ttgtctccttattctcctataccagcaaacaccttccccactgattatgtgctacggtttttgataatttcagtgcaaatg |     |
| Cucsa.322750.seq | TAGTTTGTAATGGGAGCACTGTTAACCTAGGTTTGTGGGATACAGCCGGACAGGAGGATTATAACCGGCTAAGGCCTTTG  | 219 |
| ROP5_Clone.seq   | TAGTTTGTAATGGGAGCACTGTTAACCTAGGTTTGTGGGATACAGCCGGACAGGAGGATTATAACCGGCTAAGGCCTTTG  | 240 |
| Consensus        | tagttgtgaatgggagcactgttaacctagggttgtgggatacagccggacaggaggattataacggctaaaggcctttg  |     |
| Cucsa.322750.seq | AGTTATCGTGGGCGAGATGTTTTATATTGGCATTCCTCTCATTAGCAAGGCCAGCTATGAAATGTTTCTAAAAGTG      | 299 |
| ROP5_Clone.seq   | AGTTATCGTGGGCGAGATGTTTTATATTGGCATTCCTCTCATTAGCAAGGCCAGCTATGAAATGTTTCTAAAAGTG      | 320 |
| Consensus        | agttatctgtgggagatgttttattatggcattctctctcattagcaaggccagctatgaaatgtttctaaaaagtg     |     |
| Cucsa.322750.seq | GATTCAGAGTGAAGCATTATGCTCCAGGAGTGCTATTGTTCTGGTTGGAACAAAGCTTGATCTTCGAGATGATAAGC     | 379 |
| ROP5_Clone.seq   | GATTCAGAGTGAAGCATTATGCTCCAGGAGTGCTATTGTTCTGGTTGGAACAAAGCTTGATCTTCGAGATGATAAGC     | 400 |
| Consensus        | gatttcagagtgaagcattatgctccaggagtgcctattgttctggttggaactaagcttgatcttcgagatgataagc   |     |
| Cucsa.322750.seq | AGTTCCTTATGATCATCTGGCGCAGTTCCTATTTCACAGCTCAGGGAGAGGAGCTTAGAAAGCTGATTGGAGCTCCA     | 459 |
| ROP5_Clone.seq   | AGTTCCTTATGATCATCTGGCGCAGTTCCTATTTCACAGCTCAGGGAGAGGAGCTTAGAAAGCTGATTGGAGCTCCA     | 480 |
| Consensus        | agtctcttattgatactcctgtggcgagttcctatttcaacagctcaggagaggagcttagaaagctgattggagctcca  |     |
| Cucsa.322750.seq | GCATACATCGAGTGCAGCTCAAAAACCTCAGCAGAATGTGAAGGGAGTTTTTGATGCAGCAATTAGGGTTGACTTCAACC  | 539 |
| ROP5_Clone.seq   | GCATACATCGAGTGCAGCTCAAAAACCTCAGCAGAATGTGAAGGGAGTTTTTGATGCAGCAATTAGGGTTGACTTCAACC  | 560 |
| Consensus        | gcatacatcgagtgacgtcaaaaactcagcagaatgtgaaggagtttttgatgcagcaattagggttgacttcaacc     |     |
| Cucsa.322750.seq | TCCAAAGCAGAAGAAAAAGAGAGCAAGCTCAGAAAGCATGCTCGATATTAGGATCCATGGTGAAGGAGG             | 594 |
| ROP5_Clone.seq   | TCCAAAGCAGAAGAAAAAGAGAGCAAGCTCAGAAAGCATGCTCGATATTAGGATCCATGGTGAAGGAGG             | 632 |
| Consensus        | tccaaagcagaagaaaaagagagcaagctcagaagcatgctcgatattaggatccatggtagagga                |     |

**Figure S1** The cloned nucleotide sequence of *CsROP5* cDNA was compared with the known nucleotide sequences in the cucumber genome database.

|                  |                                                                                    |     |
|------------------|------------------------------------------------------------------------------------|-----|
| Cucsa.197080.seq | .....ATGGCTTCCAGTGCTTCAAGGTTTCATCAAGTGCCTTACGGTTGGAGATGGAGCTGTTGG                  | 59  |
| ROP10_Clone.seq  | TTGATACATATGCCCGTCGAGATGGCTTCCAGTGCTTCAAGGTTTCATCAAGTGCCTTACGGTTGGAGATGGAGCTGTTGG  | 80  |
| Consensus        | atggcttccagtgcttcaaggttcatcaagtgcgttacggttggagatggagctgttgg                        |     |
| Cucsa.197080.seq | GAAGACCTGCATGCTCATATGTTATACCAGTAATAAATCCCCACTGATTATATACCCACTGTGTTTGATAACTTCAGTG    | 139 |
| ROP10_Clone.seq  | GAAGACCTGCATGCTCATATGTTATACCAGTAATAAATCCCCACTGATTATATACCCACTGTGTTTGATAACTTCAGTG    | 160 |
| Consensus        | gaagacctgcattgctcatatgtttataccagtaataaattccccactgattatataccactgtgtttgataacttcagtg  |     |
| Cucsa.197080.seq | CAAAATGTTGGTTGAAGGCACACCGTCAATTIAGGCCCTGTGGGATACCGCAGGTCAAGAAGATTACAATAGATTAAAG    | 219 |
| ROP10_Clone.seq  | CAAAATGTTGGTTGAAGGCACACCGTCAATTIAGGCCCTGTGGGATACCGCAGGTCAAGAAGATTACAATAGATTAAAG    | 240 |
| Consensus        | caaatgttgggttgaaggcaccacggtcaatttagccctgtgggataccgcaggtcaagaagattacaatagattaaag    |     |
| Cucsa.197080.seq | CCATTAAAGCTACAGAGGAGCTGATGTTTCATCCTTGTCTTTTCGTTAGTTAGCCGAGCGAGTTACGAAAACGTACTTAA   | 299 |
| ROP10_Clone.seq  | CCATTAAAGCTACAGAGGAGCTGATGTTTCATCCTTGTCTTTTCGTTAGTTAGCCGAGCGAGTTACGAAAACGTACTTAA   | 320 |
| Consensus        | ccattaagctacagaggagctgatgttttcattccttgccttttcgttagtttagccgagcgagttacgaaaacgtacttaa |     |
| Cucsa.197080.seq | GAAGTGGATTCCGGAGCTTCAACATTATGCACCTGGAGTCCCGGTGGTGTGGTTGGCACCAAATGGATCTTCGAGAGG     | 379 |
| ROP10_Clone.seq  | GAAGTGGATTCCGGAGCTTCAACATTATGCACCTGGAGTCCCGGTGGTGTGGTTGGCACCAAATGGATCTTCGAGAGG     | 400 |
| Consensus        | gaagtggattccggagcttcaacattatgcacctggagtcccggtggtgttggttggcaccaaattggatcttcgagagg   |     |
| Cucsa.197080.seq | ACAAATTCATTATTTGGCTGATCATCTGGATTGGTGCCCGTAACCACTTTGCAGGGTGAGGAACCTCCGTAACAGATAGGT  | 459 |
| ROP10_Clone.seq  | ACAAATTCATTATTTGGCTGATCATCTGGATTGGTGCCCGTAACCACTTTGCAGGGTGAGGAACCTCCGTAACAGATAGGT  | 480 |
| Consensus        | acaaattctattttggctgatcatcttgattggtgcccgttaaccactttgcagggtgaggaactccgtaaacagataggt  |     |
| Cucsa.197080.seq | GCGACATATTACGTCGAATGCAGTCAAAAACCCAGCAGAATGTGAAATCAGTTTTTGTATGCAGCAATCAAGGTGGTTAT   | 539 |
| ROP10_Clone.seq  | GCGACATATTACGTCGAATGCAGTCAAAAACCCAGCAGAATGTGAAATCAGTTTTTGTATGCAGCAATCAAGGTGGTTAT   | 560 |
| Consensus        | gcgacattattacgtcgaatgcagctcaaaaacccagcagaatgtgaaatcagtttttgatgcagcaatcaaggtggttat  |     |
| Cucsa.197080.seq | CAAGCCACCACAGAAACAAAAAGAGAAGAACGGCCACACCGTGGGTGTCTTAAATGTGTCTGTGGAAGAAACCTTA       | 619 |
| ROP10_Clone.seq  | CAAGCCACCACAGAAACAAAAAGAGAAGAACGGCCACACCGTGGGTGTCTTAAATGTGTCTGTGGAAGAAACCTTA       | 640 |
| Consensus        | caagccaccacagaaacaaaaagagaagaacggccacacccggtgggtgtctttaaattgtgtctgtggaagaacacctta  |     |
| Cucsa.197080.seq | CGAGGCAAGTGA.....                                                                  | 633 |
| ROP10_Clone.seq  | CGAGGCAAGTGA.....TCCATGGTGAAGGAGG                                                  | 671 |
| Consensus        | cgaggcaagtga                                                                       |     |

**Figure S2** The cloned nucleotide sequence of *CsROP10* cDNA was compared with the known nucleotide sequences in the cucumber genome database.
